# Supplementary material for: Augmenting biologging with supervised machine learning to study in situ behavior of the medusa Chrysaora fuscescens
Source: PubMed Central journal article supplement (PMC6739807; doi:10.1242/jeb.207654), 2019-08-23
Supplement: jexbio-222-207654-s1.pdf [file jexbio-222-207654-s1.pdf]

**Table S1. Summary of laboratory and *in situ* deployments of ITAG on *Chrysaora fuscescens***

| Laboratory     | Animal ID | Date deployed | Tag ID | Tag data (sec) | Video footage (sec) | Drogue depth (m) | Location collected  | Date collected      |
|----------------|-----------|---------------|--------|----------------|---------------------|------------------|---------------------|---------------------|
|                | T1-1      | 18/05/18      | e2     | 2321           | 1916                | N/A              | 36.7968, -121.8298  | 18/05/18            |
|                | T2-1      | 18/05/21      | b7     | 4562           | 2866                | N/A              | 36.7968, -121.8298  | 18/05/18            |
|                | T2-2      | 18/05/21      | e2     | 3110           | 3004                | N/A              | 36.7968, -121.8298  | 18/05/18            |
|                | T3-1      | 18/05/31      | b7     | 4257           | 4044                | N/A              | 36.86749, -121.9027 | 18/04/06            |
| <i>In situ</i> |           |               |        |                |                     |                  | Location deployed   | Time deployed (PDT) |
|                | S1-1      | 18/04/24      | 24     | 23479          | 264                 | 5                | 36.8315 -121.8767   | 10:42               |
|                | S1-2      | 18/04/24      | 3c     | 2166           | 614                 | None             | 36.8355, -121.8750  | 12:06               |
|                | S1-3      | 18/04/24      | e2     | 20571          | 789                 | 9                | 36.8383, -121.8759  | 12:40               |
|                | S2-1      | 18/05/14      | 24     | 16893          | 1619                | 9                | 36.8243, -121.9247  | 11:00               |
|                | S2-2      | 18/05/14      | e2     | 19464          | 1374                | 9                | 36.8219, -121.9234  | 12:21               |
|                | S3-1      | 18/05/17      | e2     | 10289          | 1332                | 9                | 36.8397, -121.8854  | 12:42               |

|  |      |          |    |       |     |   |                    |       |
|--|------|----------|----|-------|-----|---|--------------------|-------|
|  | S3-2 | 18/05/17 | 24 | 2484  | 0   | 9 | 36.8333, -121.8827 | 13:52 |
|  | S3-3 | 18/05/17 | b7 | 36400 | 975 | 9 | 36.8302, -121.8790 | 14:21 |

Footnotes: During the S3-2 deployment, the ROV lost track of the jellyfish almost immediately after release due to strong currents and no viable footage of behavior was recorded. In four out of the eight deployments (S1-1, S1-3, S3-1, and S3-2), the tag was still attached to the jellyfish at the time of retrieval. In the remaining four deployments (S1-2, S2-1, S2-2, and S3-3), the jellyfish was no longer attached.

**Table S2. Summary of laboratory and *in situ* video footage annotations**

| Laboratory       | Animal ID | Total annotated footage (sec) | Activity      |                  |                | Tether influence  |                    |                | Unannotated tag data after footage (min) |
|------------------|-----------|-------------------------------|---------------|------------------|----------------|-------------------|--------------------|----------------|------------------------------------------|
|                  |           |                               | Drift (sec)   | Swim (sec)       | Unknown (sec)  | Taut tether (sec) | Slack tether (sec) | Unknown (sec)  |                                          |
|                  | T1-1      | 1916                          | 0             | 1916<br>(100%)   | 0              | 1093<br>(57.0%)   | 816<br>(42.6%)     | 7<br>(0.4%)    | N/A                                      |
|                  | T2-1      | 2866                          | 55<br>(1.9%)  | 2811<br>(98.1%)  | 0              | 575<br>(20.1%)    | 2253<br>(78.6%)    | 38<br>(1.3%)   | N/A                                      |
|                  | T2-2      | 3004                          | 4<br>(0.1%)   | 3000<br>(99.9%)  | 0              | 550<br>(18.3%)    | 2454<br>(81.7%)    | 0              | N/A                                      |
|                  | T3-1      | 4044                          | 311<br>(7.7%) | 3733<br>(92.3%)  | 0              | 0                 | 4044<br>(100%)     | 0              | N/A                                      |
| Total laboratory |           | 11830                         | 370<br>(3.1%) | 11460<br>(96.9%) | 0              | 2218<br>(18.7%)   | 9567<br>(80.9%)    | 45<br>(0.4%)   | N/A                                      |
| <i>In situ</i>   | S1-1      | 154                           | 0             | 154<br>(100%)    | 0              | 24<br>(15.6%)     | 102<br>(66.2%)     | 28<br>(18.2%)  | 388                                      |
|                  | S1-2      | 590                           | 3<br>(0.5%)   | 350<br>(59.3%)   | 237<br>(40.2%) | 25<br>(4.2%)      | 136<br>(23.1%)     | 429<br>(72.7%) | 37                                       |
|                  | S1-3      | 653                           | 5<br>(0.8%)   | 631<br>(96.6%)   | 17<br>(2.6%)   | 127<br>(19.4%)    | 207<br>(31.7%)     | 319<br>(48.9%) | 339                                      |
|                  | S2-1      | 1431                          | 7<br>(0.5%)   | 1415<br>(98.9%)  | 9<br>(0.6%)    | 0                 | 727<br>(50.8%)     | 704<br>(49.2%) | 262                                      |

|                      |      |      |              |                 |               |               |                 |                 |      |
|----------------------|------|------|--------------|-----------------|---------------|---------------|-----------------|-----------------|------|
|                      | S2-2 | 1347 | 0            | 1347<br>(100%)  | 0             | 0             | 1285<br>(95.4%) | 62<br>(4.6%)    | 311  |
|                      | S3-1 | 1158 | 31<br>(2.7%) | 1116<br>(96.4%) | 11<br>(0.9%)  | 69<br>(6.0%)  | 285<br>(24.6%)  | 804<br>(69.4%)  | 146  |
|                      | S3-2 | 0    | N/A          | N/A             | N/A           | N/A           | N/A             | N/A             | 54   |
|                      | S3-3 | 762  | 33<br>(4.3%) | 721<br>(94.6%)  | 8<br>(1.0%)   | 80<br>(10.5%) | 83<br>(10.9%)   | 599<br>(78.6%)  | 590  |
| Total <i>in situ</i> |      | 6095 | 79<br>(1.3%) | 5734<br>(94.1%) | 282<br>(4.6%) | 325<br>(5.3%) | 2825<br>(46.3%) | 2945<br>(48.3%) | 2127 |

**Table S3. Tether-influence and activity predictions for individual jellyfish**

| Deployment ID | Representative pulse frequency (pulses/sec) | Unannotated data* classified as influenced | Unannotated data* classified as drifting (out of time classified as uninfluenced) |
|---------------|---------------------------------------------|--------------------------------------------|-----------------------------------------------------------------------------------|
| S1-1          | 0.260                                       | 35.1%                                      | 19.1%                                                                             |
| S1-2          | 0.487                                       | 21.2%                                      | 0%                                                                                |
| S1-3          | 0.615                                       | 6.0%                                       | 0.9%                                                                              |
| S2-1          | 0.520                                       | 3.3%                                       | 0%                                                                                |
| S2-2          | 0.466                                       | 5.0%                                       | 0.1%                                                                              |
| S3-1          | 0.275                                       | 28.2%                                      | 5.6%                                                                              |
| S3-2          | 0.422                                       | 9.8%                                       | 0.6%                                                                              |
| S3-3          | 0.380                                       | 11.4%                                      | 2.7%                                                                              |

\* Rightmost column of Table S2.

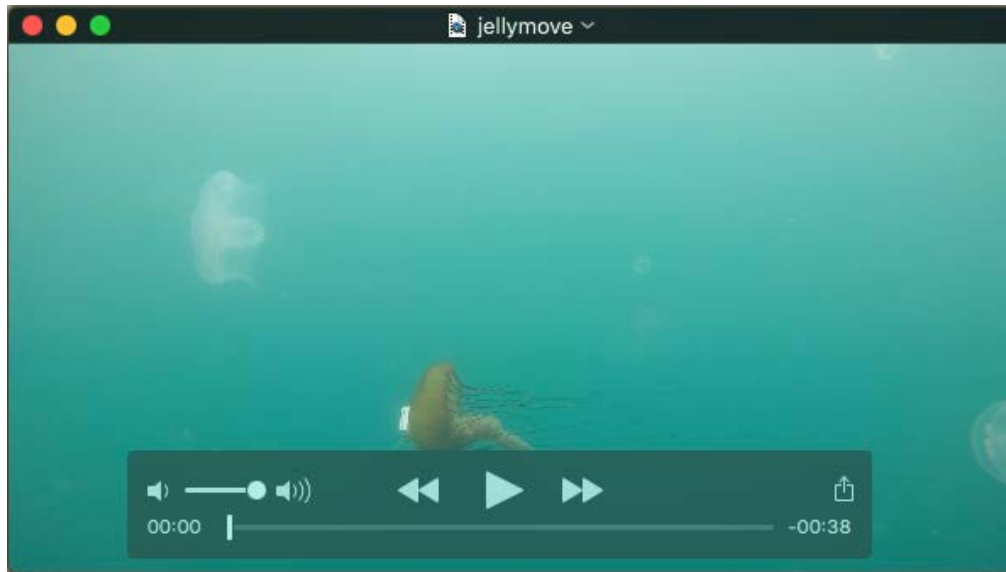

**Movie 1. Examples of annotated *in situ* and laboratory footage.** In order, uninfluenced *in situ* swimming, tether-influenced *in situ* swimming, *in situ* swimming with unknown tether status, uninfluenced *in situ* drifting, tether-influenced *in situ* drifting, and swimming and drifting in the MBARI Test Tank.
